# Supplementary material for: De Novo Assembly and Characterization of the Transcriptome of an Omnivorous Camel Cricket (Tachycines meditationis)
Source: MDPI journal article supplement (doi:10.3390/ijms24044005), 2023-02-16
Supplement: s1 [file s1]

## Supplementary Figures

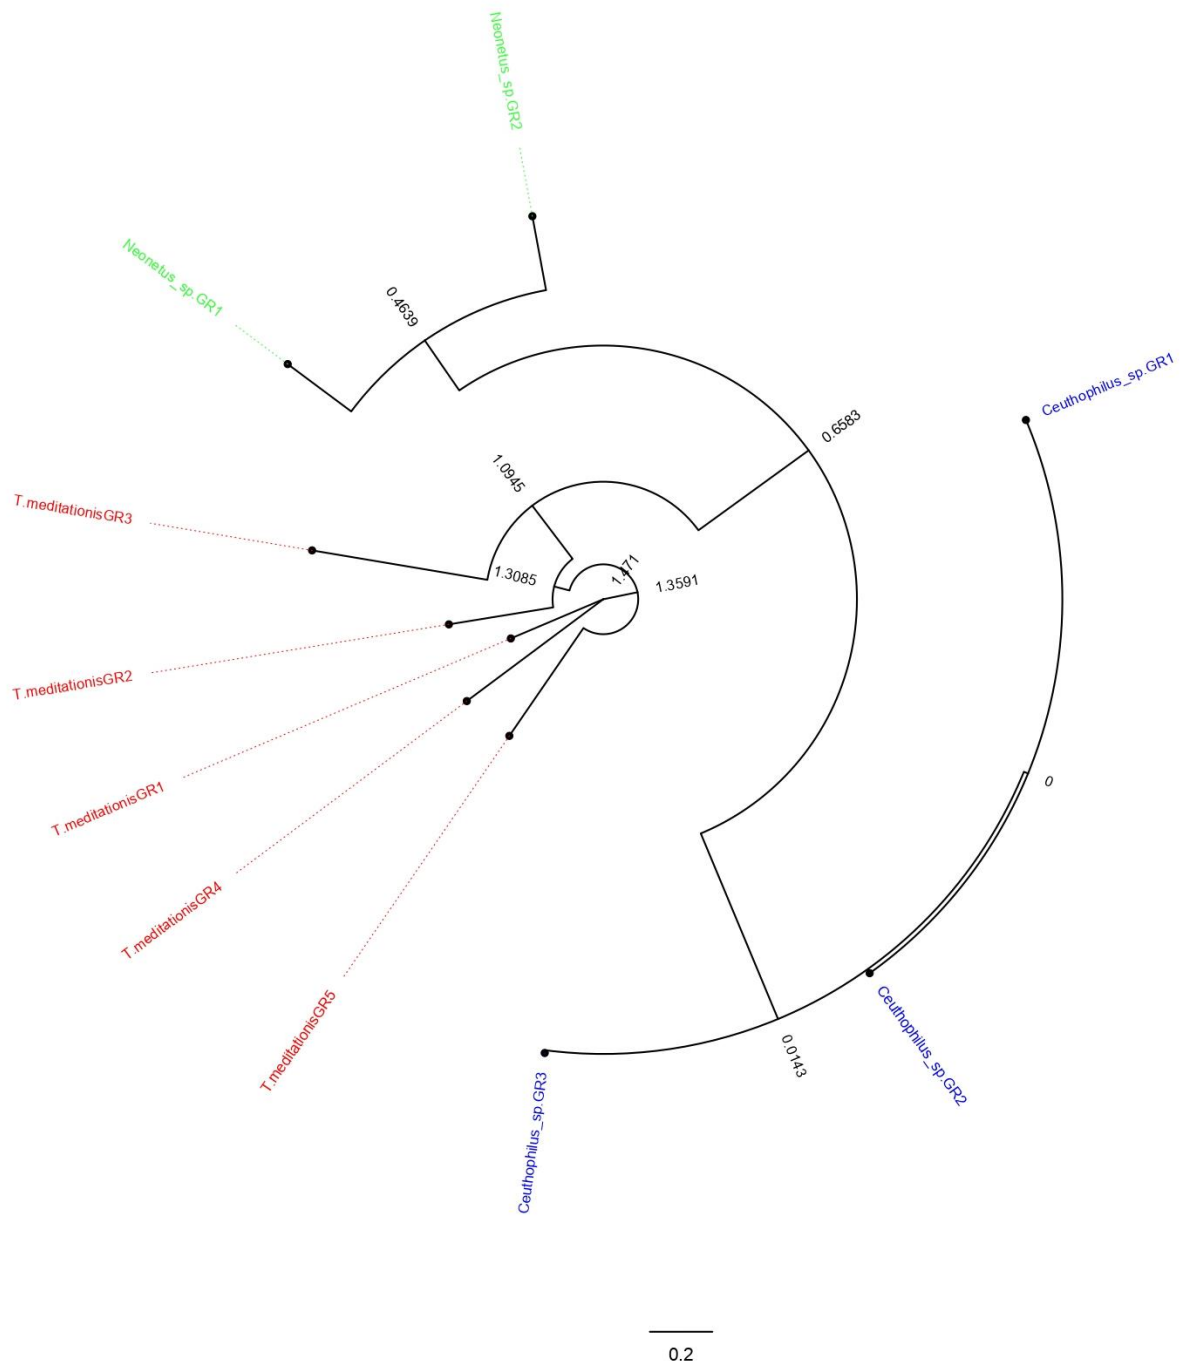

**Figure S1.** The ML phylogenetic tree of GR genes.

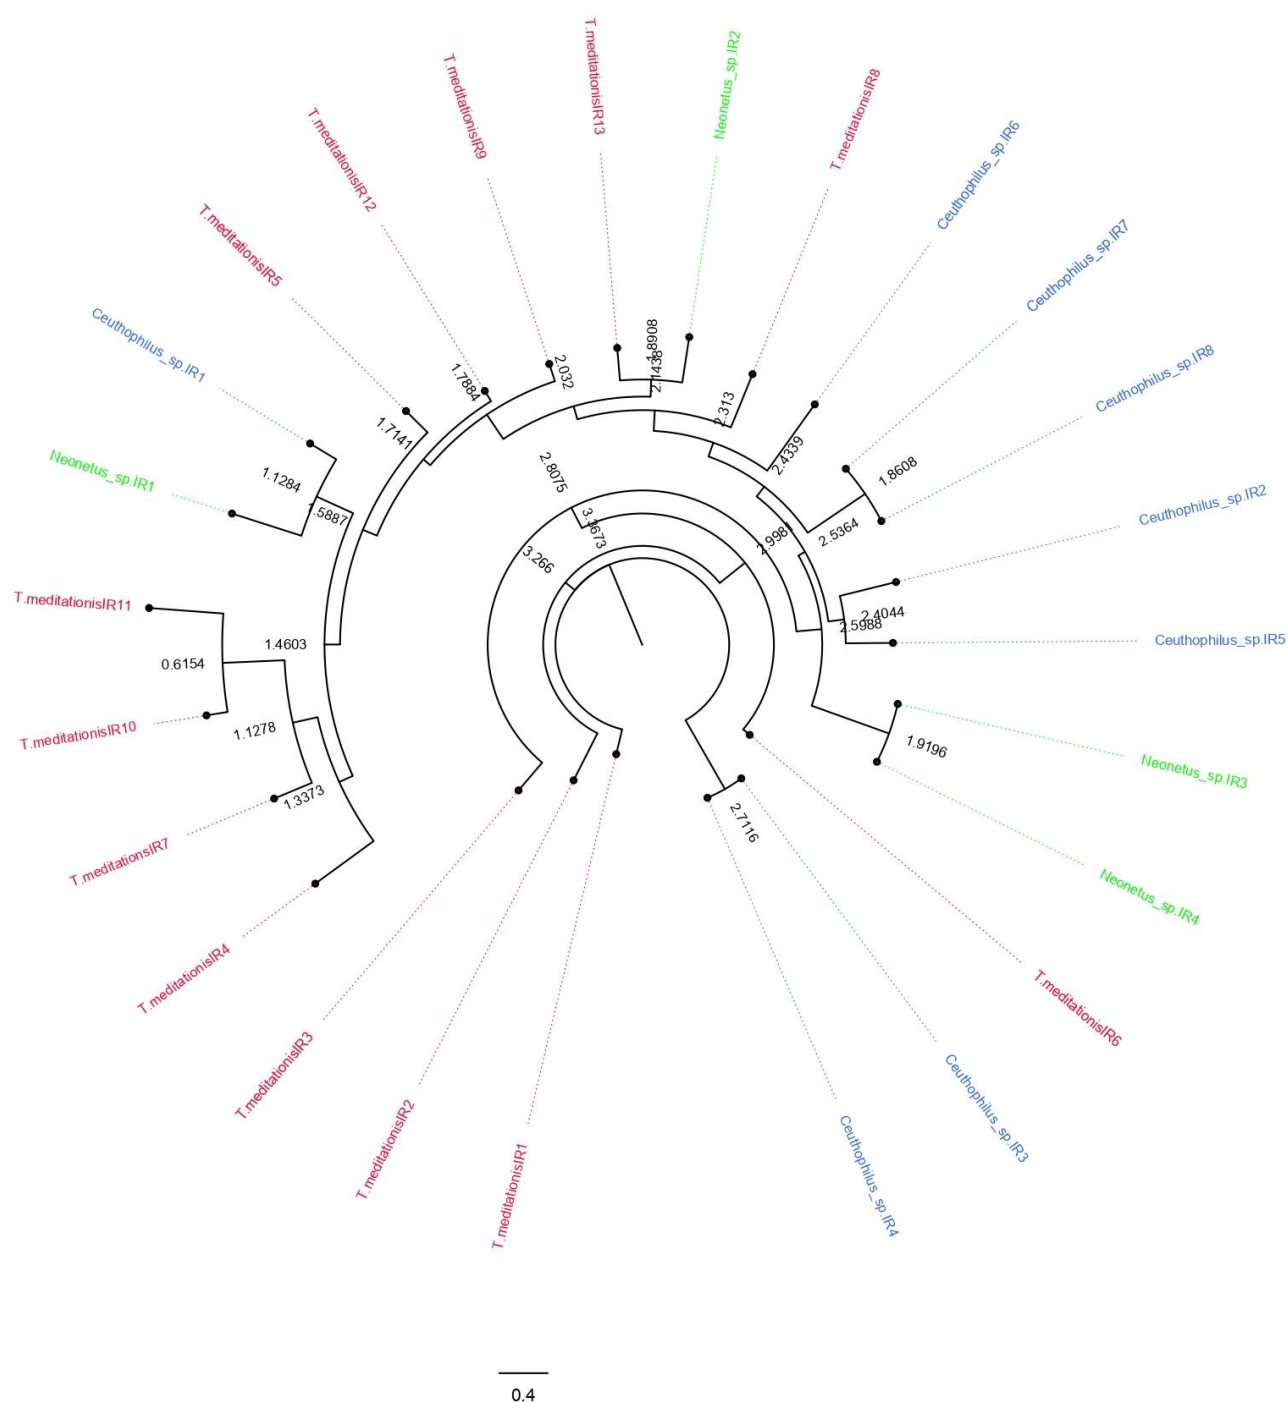

**Figure S2.** The ML phylogenetic tree of IR genes.

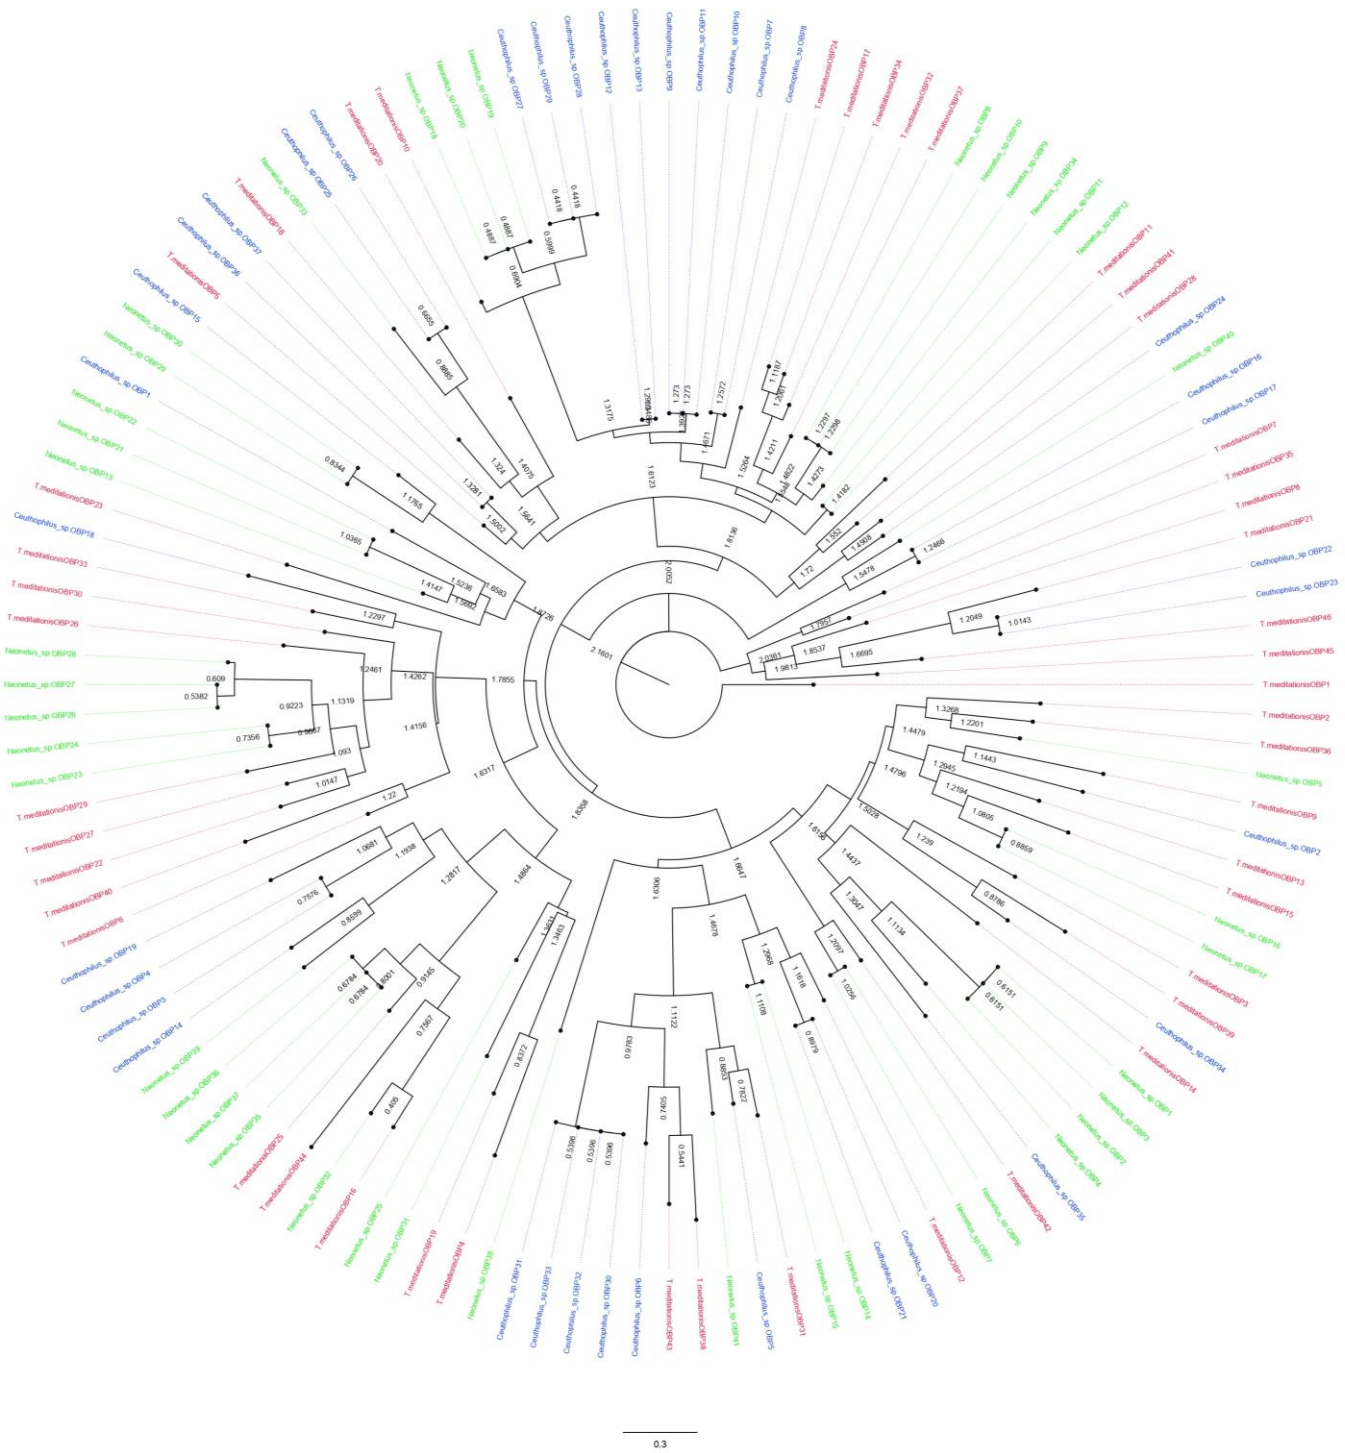

**Figure S3.** The ML phylogenetic tree of OBP genes.

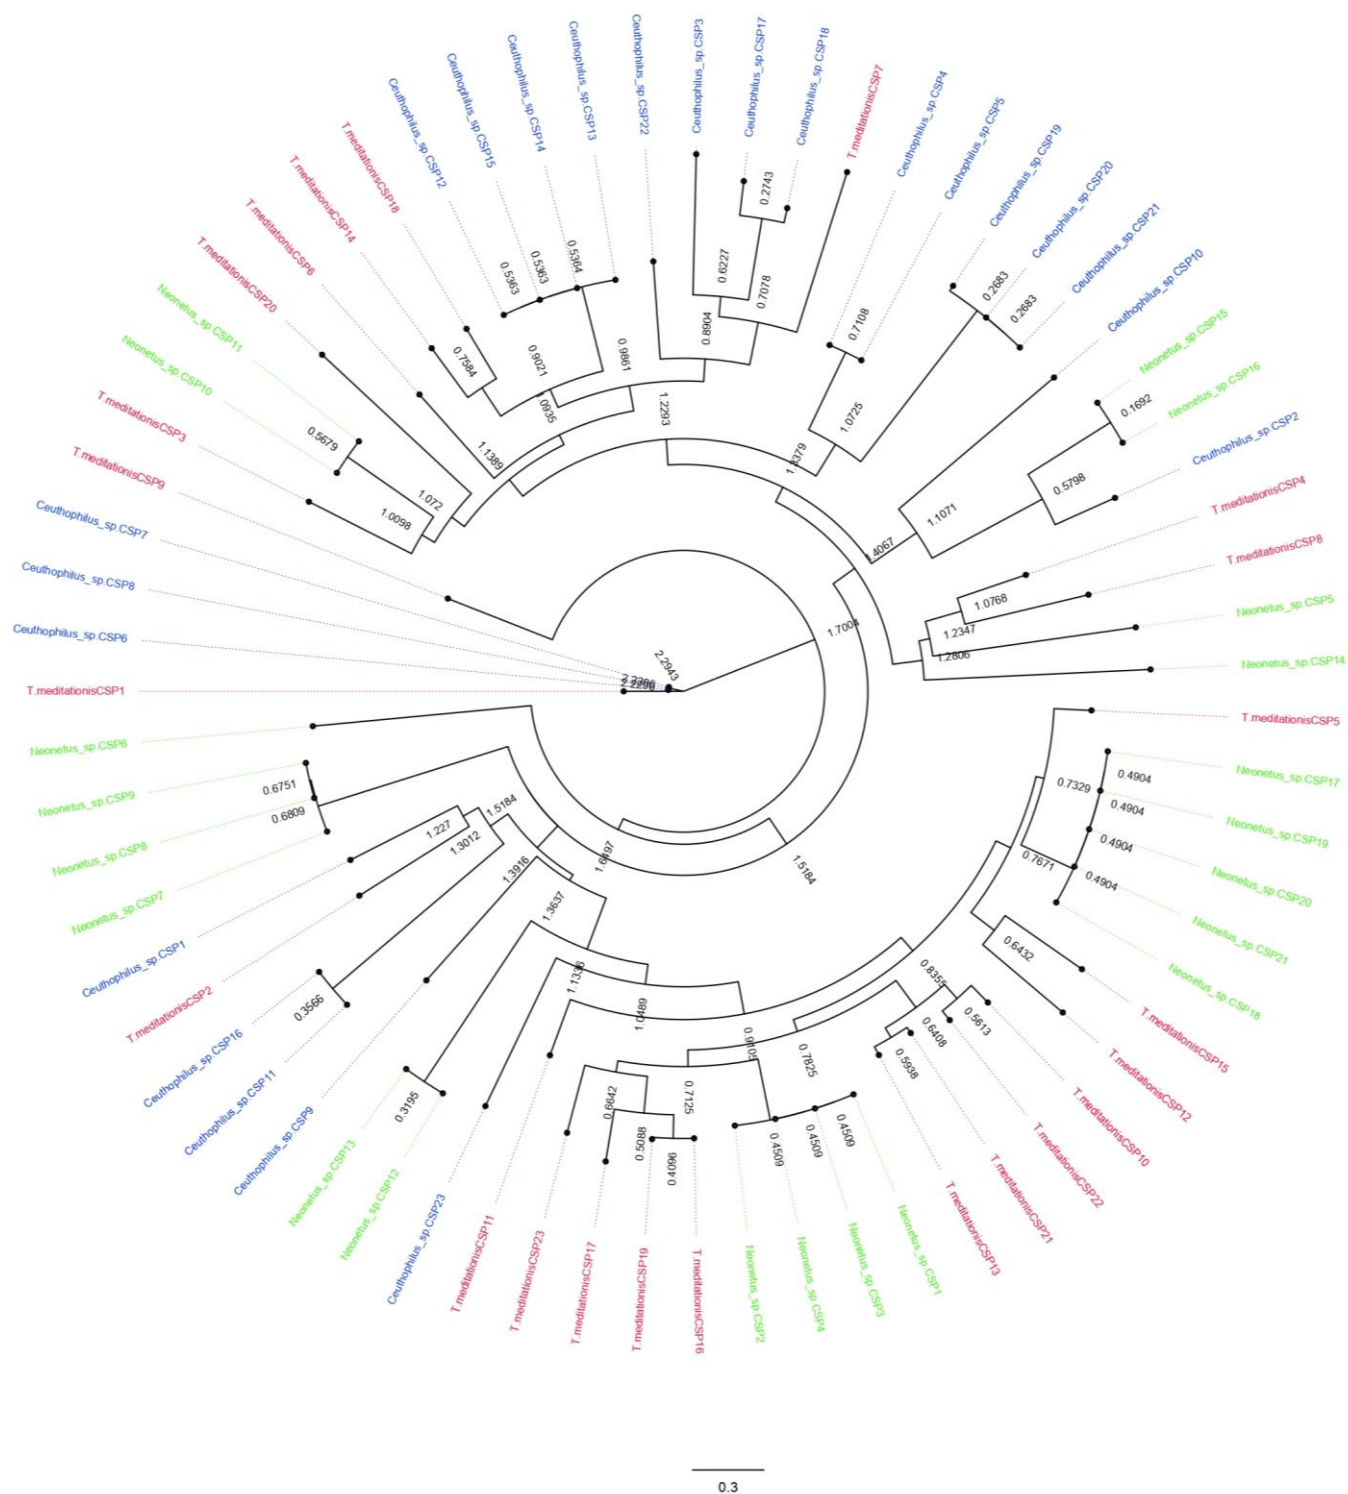

Figure S4. The ML phylogenetic tree of CSP genes.

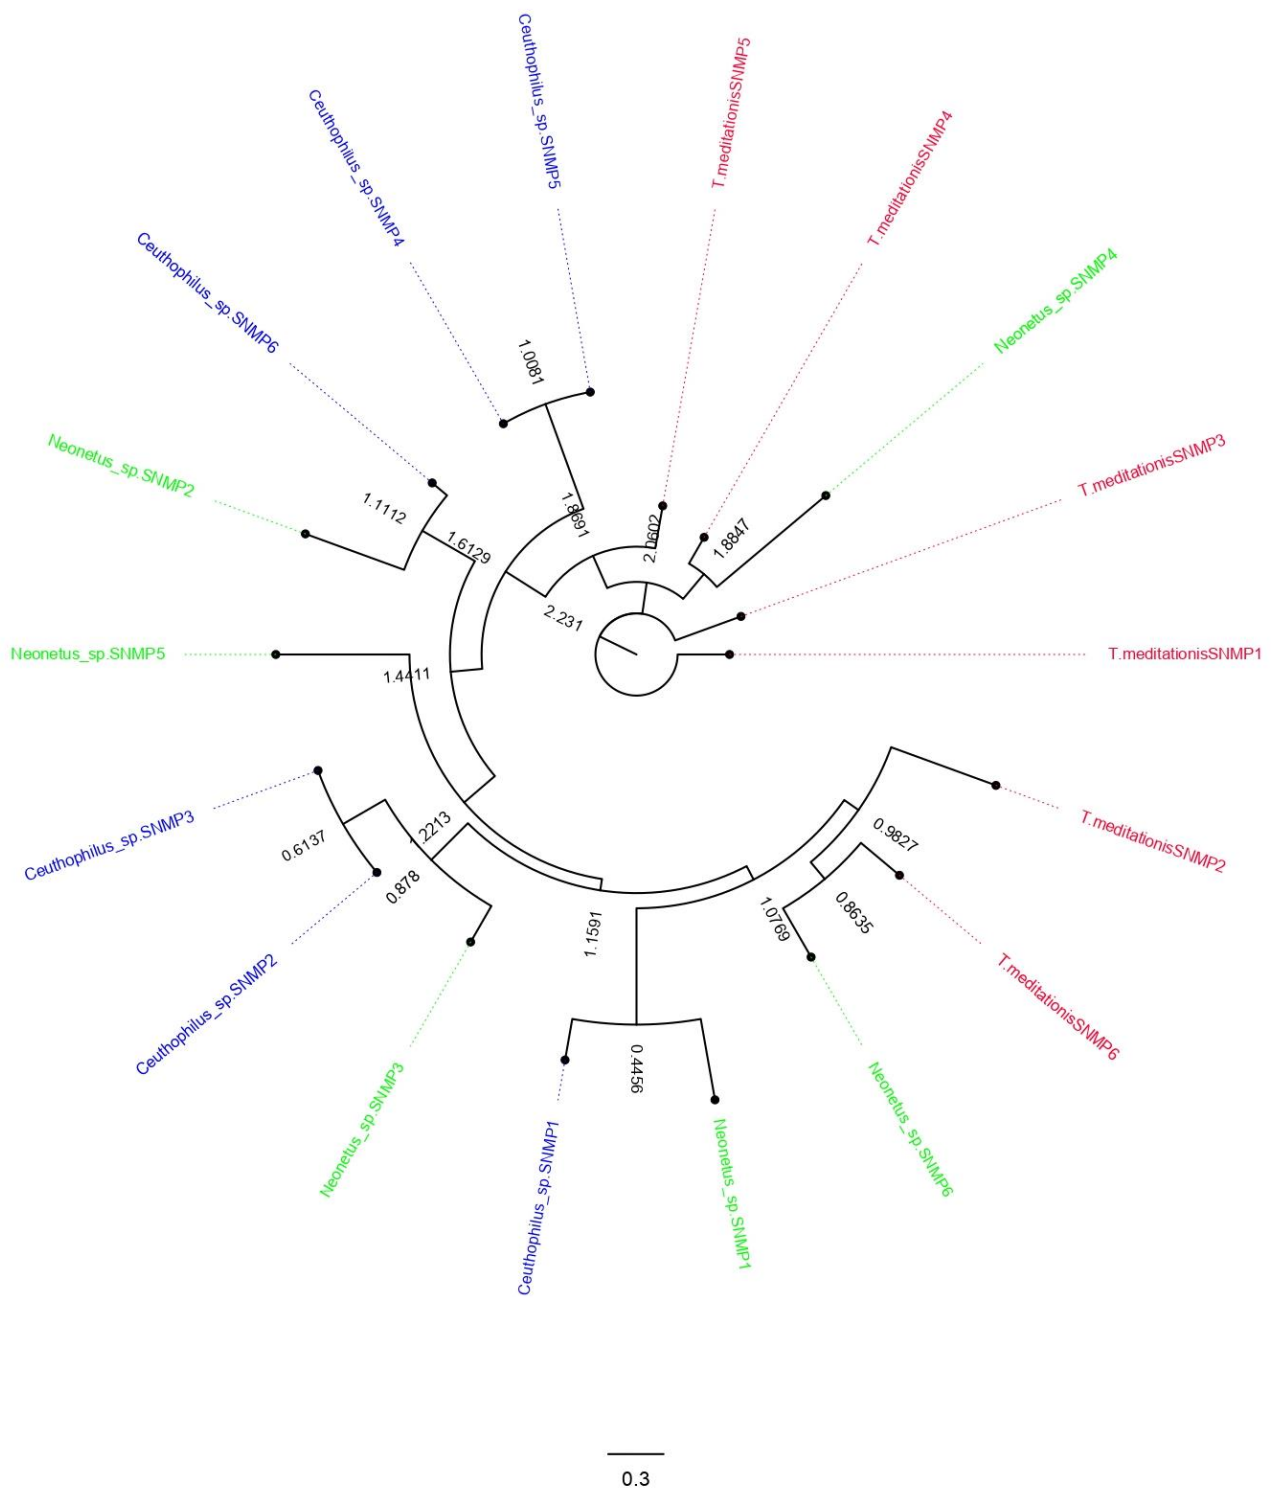

Figure S5. The ML phylogenetic tree of SNMP genes.

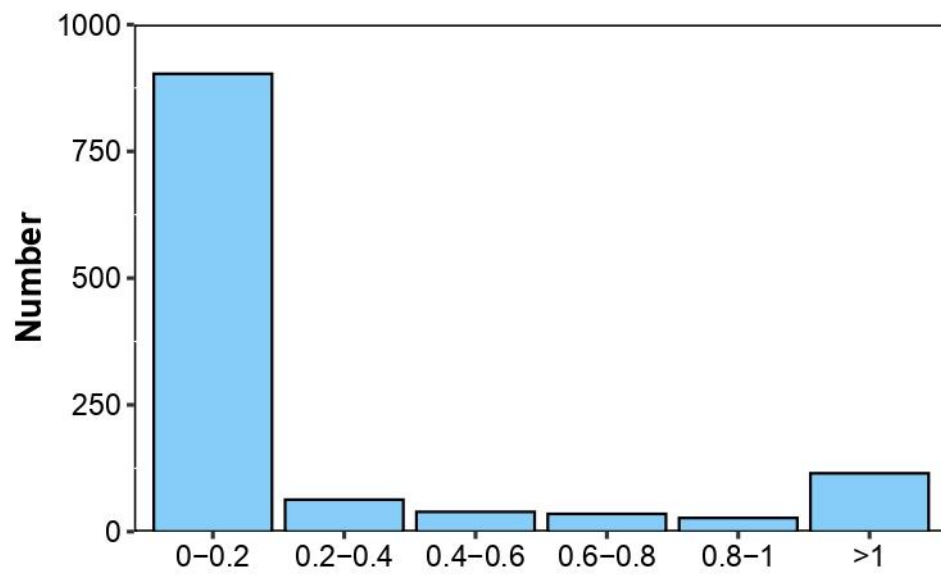

**Figure S6.** The distribution of branch-specific dN/dS of orthologous genes identified among *T.meditationis* and two camel crickets species.
