# Supplementary material for: De Novo Assembly and Characterization of the Transcriptome of an Omnivorous Camel Cricket (Tachycines meditationis)
Source: Int J Mol Sci. 2023 Feb 16;24(4):4005. doi: 10.3390/ijms24044005 (PMC9966759; doi:10.3390/ijms24044005)
Supplement: Supplementary file 1 [file ijms-24-04005-s001.zip › ijms-2170599 Table S1.xlsx]

## Sheet: Sheet1
Table S1. The correlation between the relative usage of 17 synonymous codon pairs and gene's expression in T.meditationis.
AA	Synonymous codon pairs	P	R2	AA	Synonymous codon pairs	p	R2
Arg	CGU/(CGA+CGU)	0.5749	1.1e-05	Pro	CCC/(CCC+CCG)	0.4125	2.86e-05
Arg	CGC/(CGC+CGG)	0.8419	1.4e-06	Leu	CUU/(CUU+CUA)	0.5044	1.31e-05
Ala	GCU/(GCU+GCA)	0.7425	7.1e-06	Leu	CUC/(CUG+CUC)	0.2328	3.67e-05
Ala	GCC/(GCC+GCG)	0.8627	1.8e-06	Ser	UCU/(UCU+UCA)	0.6402	1.25e-05
Gly	GGU/(GGU+GGA)	0.352	3.94e-05	Ser	UCC/(UCC+UCG)	0.6006	1.57e-05
Gly	GGC/(GGC+GGG)	0.1041	0.000135	Val	GUU/(GUU+GUA)	0.8088	2.6e-06
Ile	AUU/(AUU+AUA)	0.1829	0.0004537	Val	GUC/(GUC+GUG)	0.9149	4e-07
Pro	CCU/(CCU+CCA)	0.4728	1.94e-05	Thr	ACU/(ACU+ACA)	0.7864	2.54e-05
Thr	ACC/(ACC+ACG)	0.8357	2.2e-06
